# Supplementary material
Source: publisher figshare collection journal article supplement (https://tandf.figshare.com/ndownloader/files/15323489)
Supplement: Supplementary file 1 [file 15323489]

**Supplementary table 1**

Demographics of G93A-SOD1 mice used in MRI diffusion studies

| **Control Group** | | **G93A-SOD1 Group** | | | | | |
| --- | --- | --- | --- | --- | --- | --- | --- |
| **P80 mice** | | **P60 mice** | | **P80 mice** | | **P120 mice** | |
| **Code Number** | **Gender** | **Code Number** | **Gender** | **Code Number** | **Gender** | **Code Number** | **Gender** |
| B60 | F | 3191 | F | 3086 | F | B62 | F |
| 3088 | M | 3192 | F | B58 | F | 2841 | M |
| 3088 | M | 3089 | M | 3080 | M | B64 | M |
| - | - | 3193 | F | 3079 | M | B67 | F |
| - | - | 3063 | M | 2837 | M | B54 | F |

**Abbreviations:** G93A-SOD1, transgenic mice with the overexpression of human mutant gene copper zinc superoxide dismutase identified in familiar forms of ALS patients; P60, postnatal day 60; P80, postnatal day 80; P1200, postnatal day 120; F, female; M, male.
